# Supplementary material
Source: publisher figshare collection journal article supplement (https://frontiersin.figshare.com/ndownloader/files/12353348)
Supplement: Supplementary file [file 12353348]

## Anti-CD3 Fab fragments enhance tumor killing by human $\gamma\delta$ T cells independent of Nck recruitment to the $\gamma\delta$ TCR

Claudia Juraske, Piyamaporn Wipa, Anna Morath, Jose Villacorta Hidalgo, Frederike A. Hartl, Katrin Raute, Hans-Heinrich Oberg, Daniela Wesch, Paul Fisch, Susana Minguet, Sutatip Pongcharoen, Wolfgang W. Schamel

### SUPPLEMENTAL DATA

|                       |        |
|-----------------------|--------|
| Supplemental Figure 1 | page 1 |
| Supplemental Figure 2 | page 2 |
| Supplemental Figure 3 | page 2 |
| Supplemental Figure 4 | page 2 |
| Supplemental Figure 5 | page 3 |

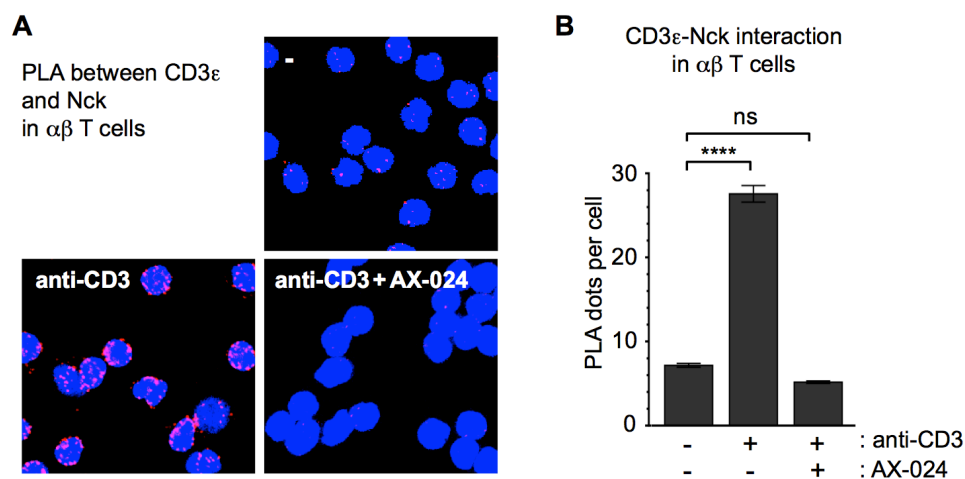

**SUPPLEMENTAL FIGURE 1 | AX-024 reduces the PLA signal in anti-CD3 stimulated  $\alpha\beta$  T cells.** (A) Close proximity between the TCR and Nck was detected by *in situ* PLA. Purified primary  $\alpha\beta$  T cells from human blood were either left untreated (-), or stimulated with 5  $\mu\text{g/ml}$  anti-CD3 (OKT3) in the absence or presence of 10 nM AX-024 at 37°C for 5 min. PLA was performed as in figure 2. (B) The corresponding quantification of the red PLA dots and the mean  $\pm$  SEM is displayed; Statistics was done by two-tailed t test. For each condition approx. 800 cells were analysed. Three independent experiments were performed (n=3). This experiment shows that PLA can be used to detect a block in the interaction of SH3.1(Nck) with the TCR in  $\alpha\beta$  T cells.

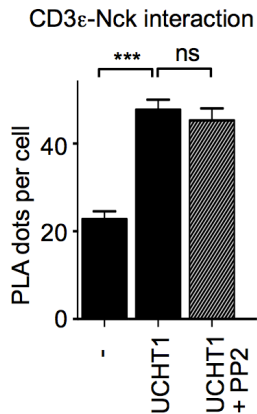

**SUPPLEMENTAL FIGURE 2 | Inhibition of CD3 phosphorylation by PP2 does not prevent binding of Nck to the  $\gamma\delta$  TCR.** Close proximity between the TCR and Nck was detected by *in situ* PLA. Zoledronate expanded  $\gamma\delta$  T cells were either left untreated or treated with 5  $\mu$ g/ml UCHT1 in the absence or presence of 20  $\mu$ M PP2 at 37°C for 5 min. PLA was performed and quantified as in figure 2. For each condition 200 cells were analyzed (n=1). This experiment shows that CD3 phosphorylation is not necessary for the recruitment of Nck to the  $\gamma\delta$  TCR.

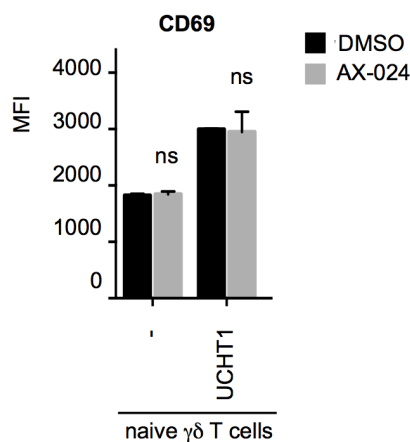

**SUPPLEMENTAL FIGURE 3 | In naive  $\gamma\delta$  T cells CD69 up-regulation is not inhibited by AX-024.** Freshly prepared peripheral blood mononuclear cells of a healthy donor were stimulated without (-) or with 5  $\mu$ g/ml UCHT1 at 37°C and 5% CO<sub>2</sub> for 18 hours. Subsequently, cells were fixed and stained with an anti-CD69 antibody. Afterwards, cells were permeabilized and stained with anti-CD3 and anti- $\gamma/\delta$ TCR antibodies. Fluorescence intensities were quantified by flow cytometry and the mean fluorescence intensity (MFI) is displayed. Data were analyzed as in figure 7 (n=2). This experiment shows that UCHT1-induced upregulation of CD69 is independent of Nck recruitment to the TCR in naive  $\gamma\delta$  T cells.

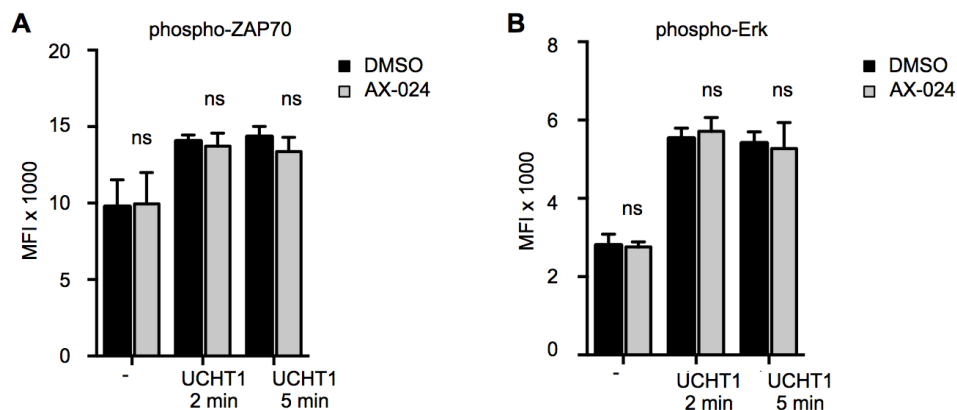

**SUPPLEMENTAL FIGURE 4 | Phosphorylation of ZAP70 and Erk is not inhibited by AX-024 treatment.** Freshly prepared peripheral blood mononuclear cells were stimulated without (-) or with 10  $\mu$ g/ml UCHT1 at 37°C for 2 or 5 min. Subsequently, cells were fixed, permeabilized and stained with anti- $\gamma/\delta$ TCR and (A) anti-phospho-ZAP70 or (B) anti-phospho-Erk antibodies. Fluorescence intensities were quantified by flow cytometry and the mean fluorescence intensity (MFI) of the phospho-protein in  $\gamma\delta$  T cells is displayed. Data were analyzed as in figure 7 (n=2). This experiment shows that phosphorylation of ZAP70 and Erk does not require the Nck- $\gamma\delta$  TCR interaction.

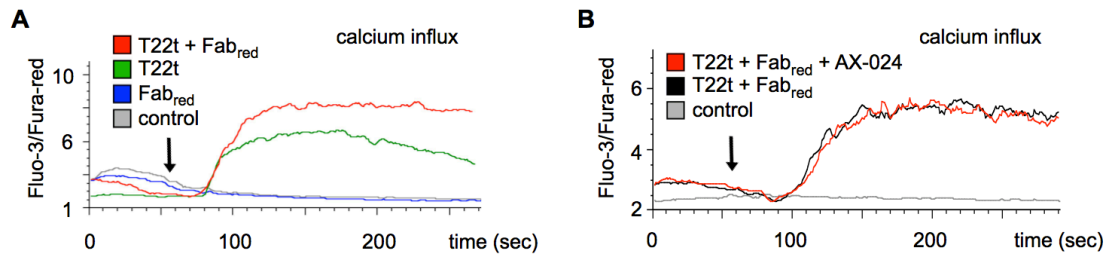

**SUPPLEMENTAL FIGURE 5 | Calcium signaling is enhanced by Fab<sub>red</sub> fragments and is not inhibited by AX-024 treatment.** (A and B) The calcium influx measurements were performed as in figures 8B and 8C, with the only difference that Fab<sub>red</sub> instead of Fab fragments were used. This experiment demonstrates that T22 tetramer-induced calcium signaling is enhanced by Fab<sub>red</sub> fragments and that this calcium response does not require Nck recruitment to the G8  $\gamma\delta$  TCR.
